# Supplementary material for: Small Amazonian stingless bees: an opportunity for targeted cocoa pollination
Source: Frontiers journal article supplement (doi:10.3389/frbee.2024.1357811), 2024-08-02
Supplement: Table_1.DOCX [file Table_1.DOCX]

**Supplementary Material**

| **Species** | **Geographic distribution** |
| --- | --- |
| *Celetrigona euclydiana* | Brazil (Acre [Mâncio Lima]), Peru (San Martín) |
| *Celetrigona hirsuticornis* | Brazil (Acre [Marechal Thaumaturgo], Amazonas [Tapauá], Mato Grosso [Nova Mutum], Rondônia [Campo Novo De Rondônia, Cerejeiras, Cujubim, Guajará-Mirim, Mirante Da Serra, Nova Mamoré, Nova União, Ouro Preto Do Oeste, Porto Velho]) |
| *Celetrigona longicornis* | Bolivia (El Beni), Brazil (Amapá, Amazonas [Juruá, Manaus, São Gabriel Da Cachoeira, Tefé], Goiás [Aragarças, Piranhas], Maranhão [Arari, Chapadinha, Imperatriz], Mato Grosso [Aripuanã, Barra Do Garças, Campo Novo Do Parecis, Campo Verde, Cuiabá, Diamantino, Gaúcha Do Norte, Jaciara, Juína, Nova Lacerda, Nova Mutum, Nova Ubiratã, Nova Xavantina, Porto Estrela, Rondonópolis, Sinop, Vila Bela Da Santíssima Trindade], Pará [Conceição Do Araguaia, Cumaru Do Norte, Faro, Itaituba, Óbidos], Rondônia [Guajará-Mirim, Mirante Da Serra, Pimenta Bueno, Vilhena]), Colombia (Caquetá), Guyana, Peru (Madre de Dios, Pasco, San Martin) |
| *Celetrigona manauara* | Brazil (Amapá [Serra Do Navio], Amazonas [Itacoatiara, Manaus], Pará [Oriximiná, Óbidos]), French Guiana (Saint-Laurent du Maroni), Guyana |
| *Dolichotrigona browni* | Bolivia (El Beni, La Paz), Brazil (Acre [Plácido De Castro, Rio Branco], Mato Grosso [Cáceres], Rondônia [Alta Floresta D'Oeste, Campo Novo De Rondônia, Cujubim, Guajará-Mirim, Monte Negro, Nova Mamoré, Nova União, Ouro Preto Do Oeste, Pimenta Bueno, Porto Velho, Rolim De Moura, São Miguel Do Guaporé]), Ecuador (Napo), Peru (Cusco, Loreto, Madre de Dios, San Martín) |
| *Dolichotrigona clavicornis* | Brazil (Acre [Mâncio Lima]) |
| *Dolichotrigona mendersoni* | Brazil (Acre [Rio Branco, Reserva Extrativista Boa Esperança, Porto Dias], Amazonas [Tapauá], Rondônia [Extrema, Porto Velho]) |
| *Dolichotrigona moratoi* | Brazil (Acre [Brasiléia, Mâncio Lima, Sena Madureira], Amazonas [Tabatinga], Rondônia [Forte do Píncipe da Beira, Parna, Porto Velho), Peru (Loreto) |
| *Dolichotrigona rondoni* | Brazil (Rondônia [Costa Marques, Cujubim, Guajará-Mirim, Machadinho D'Oeste, Mirante Da Serra, Nova Mamoré, Ouro Preto Do Oeste, Porto Velho, Reserva Extrativista do Rio Ouro Preto, São Miguel Do Guaporé, Vilhena]) |
| *Dolichotrigona tavaresi* | Brazil (Acre [Mâncio Lima], Amazonas [Maraã, Tapauá]) |
| *Dolichotrigona longitarsis* | Brazil (Acre [Rio Branco], Amazonas [Barcelos, Fonte Boa, Itacoatiara, Japurá, Manaus, Maraã, Santo Antônio Do Içá, São Gabriel Da Cachoeira, Tabatinga, Tefé], Maranhão [Imperatriz, Santa Helena], Mato Grosso [Vila Bela Da Santíssima Trindade], Pará [Anajás, Cumaru Do Norte, Itaituba, Oriximiná, Óbidos], Rondônia [Buritis, Campo Novo De Rondônia, Costa Marques, Cujubim, Guajará-Mirim, Jaru, Machadinho DOeste, Mirante Da Serra, Nova Mamoré, Nova União, Ouro Preto Do Oeste, Pimenta Bueno, Pimenteiras Do Oeste, Porto Velho]), French Guiana (Saint-Laurent du Maroni), Peru (Junín, Loreto, Madre de Dios) |
| *Frieseomelitta doederleini* | Brazil (Alagoas, Bahia [Barra, Castro Alves, Salvador], Ceará [Baturité, Guaramiranga], Maranhão [Barreirinhas, Chapadinha, Codó], Mato Grosso [Juína], Minas Gerais, Paraíba [Junco Do Seridó, Mamanguape, São José Do Sabugi, São João Do Cariri], Pará [Parauapebas], Pernambuco [Igarassu, Recife, Serra Talhada], Piauí [Bom Jesus, Brejo Do Piauí], Rio Grande do Norte [João Câmara, Santana Do Seridó, Serra Negra Do Norte], Sergipe [Areia Branca]) |
| *Frieseomelitta flavicornis* | Brazil (Amapá [Macapá], Amazonas [Barreirinha, Manaus, Parintins], Bahia [Alagoinhas], Maranhão [Carutapera], Mato Grosso [Barra do Tapirape], Pará [Monte Alegre, Óbidos], Paraíba [Santa Luzia, Soledade], Rio Grande do Norte [Serra Negra do Norte], Rondônia [Mirante da Serra], Roraima, Tocantins [Ilha do Bananal]), French Guiana (Cayenne, Saint-Laurent du Maroni), Guyana (Potaro-Siparuni), Peru (Cusco, Madre de Dios), Suriname |
| *Frieseomelitta longipes* | Brazil (Amazonas [Itacoatiara, Tapera], Mato Grosso [Barra do Tapirape, Nova Ubiratã], Pará [Belém, Conceição Do Araguaia, Mussum, Puraquequara, Santarém], Roraima [Ilha de Maracá]), Guyana (Potaro-Siparuni), Suriname |
| *Frieseomelitta portoi* | Brazil (Acre, Amazonas [Lago do Peixe Boi, Manaus, Tefé, Iranduba, Parque Nacional do Jaú, Santa Isabel do Rio Negro], Maranhão [Alcântara, São Luís], Mato Grosso [Local do Massacre], Pará [Almeirim, Belém, Itaituba, Melgaço], Rondônia), French Guiana (Cayenne, Saint-Laurent-du-Maroni), Guyana (Cuyuni-Mazaruni), Peru (Huánuco, Loreto) |
| *Frieseomelitta silvestrii* | Bolivia (Santa Cruz), Brazil (Amazonas [Humaita, Manaus], Bahia [Cocos], Goiás [Aragarças], Mato Grosso [Chavantina, Cuiabá, Nova Ubiratã], Pará [Conceição do Araguaia, Itaituba, Tauari], Piauí [Bom Jesus], Rondônia [Campo Novo, Jaci-Paraná, Pimento Bueno, Porto Velho, Vilhena], São Paulo [Cosmópolis, Franca, Juniaí, Ribeirão Preto, São Simão], Tocantins [Mateiros]), Paraguay |
| *Frieseomelitta trichocerata* | Bolivia (El Beni, La Paz), Brazil (Acre [Boa Esperança, Jurua], Amapá, Amazonas [Aleixo, Anavilhanas, Bacururu, Itacoatiara, Juami-Japurá, Manaus, Manicore, Santa Isabel do Rio Negro, Tapuruuara-Mirim, Vila Carixeno], Mato Grosso [Chapada, Juruna, Nhambiquaras, Sinop, Villa Vera], Mato Grosso do Sul [Rio Sucuriú], Pará [Belém, Cachimbo, Jacareacanga, Rio Trombetas], Paraíba [João Pessoa], Paraná [Curitiba], Rondônia [Nova União, Ouro Preto, Pimenta Bueno], Roraima [Santa Maria do Boiaçu]), Colombia (Meta) Peru (Amazonas, Huánuco, Junín, Loreto, Madre de Dios), Suriname (Sipaliwini) |
| *Frieseomelitta varia* | Argentina (Misiones), Bolivia (Santa Cruz), Brazil (Amazonas [Santa Isabel do Rio Negro], Bahia [Casa Nova, Lençóis], Ceará [Guaramiranga, Mulungu, Saboeiro], Goiás [Aragarças, Jataí, Luziânia, Santa Rita do Araguaia], Maranhão [Reserva do Mirador, Serra do Bacaba], Mato Grosso [Alto Araguaia, Chapada dos Guimarães, Conceição das Lagoas, Cuiabá, Juína], Mato Grosso do Sul, Minas Gerais [Araguari, Conceição das Alagoas, Januária, Paraopeba, Pirapora, Uberlândia], Pará [Belterra, Igarape-Açu, Obidos], Paraíba [São João do Cariri, São Jose do Sabugi, Santa Luzia do Sabuji, Teixeira], Pernambuco [Caetés, Catimbau, Igarassu, Paranatama, Pedra, Venturosa], São Paulo [Avanhandava, Bauru, Cajuru, Campinas, Corumbataí, Cosmópolis, Franca, Jundiaí, Luís Antônio, Onda Verde, Pitangueiras, Ribeirão Preto, São Paulo, São Simão, Santa Rita do Passa Quatro], Sergipe [Canindé de São Francisco], Tocantins [Ilha do Bananal, Itacajá]) |
| *Leurotrigona gracilis* | Brazil (Acre [Mâncio Lima], Amazonas [Manaus, Rio Negro, São Gabriel Da Cachoeira, Tefé], Mato Grosso [Nhambiquaras], Rondônia [Costa Marques, Cujubim, Guajará-Mirim, Mirante Da Serra, Nova Mamoré, Pimenta Bueno, Parque Estadual Guajará-Mirim, Reserva Extrativista do Rio Ouro Preto, Ouro Preto do Oeste]) |
| *Leurotrigona muelleri* | Argentina (Misiones), Bolivia (El Beni, La Paz, Pando, Santa Cruz de la Sierra), Brazil (Alagoas [Quebrangulo], Bahia [Boninal, Lençóis], Ceará [Guaramiranga], Espírito Santo, Goiás [Aragarças], Maranhão [Alcântara], Mato Grosso [Barra Do Garças, Cáceres, Nova Mutum, Nova Xavantina, Porto Estrela], Mato Grosso do Sul [Três Lagoas], Minas Gerais [Bonfinópolis De Minas, Itamogi, Ituiutaba, Lontra, Paraopeba, Passos, Pedras De Maria Da Cruz, Ponte Nova, Santana Do Riacho, Turmalina, Uberlândia, Vargem Bonita], Pará, Paraná [Foz Do Iguaçu, Guaíra, Londrina, Morretes, Prudentópolis], Paraíba [Mamanguape], Rio de Janeiro [Santa Maria Madalena], Rondônia [Buritis, Campo Novo De Rondônia, Cujubim, Guajará-Mirim, Nova Mamoré, Ouro Preto Do Oeste, Parque Estadual Guajará-Mirim, Reserva Extrativista do Rio Ouro Preto, Pimenta Bueno], Santa Catarina [Blumenau, Campo Alegre, Corupá], São Paulo [Avanhandava, Batatais, Botucatu, Corumbataí, Franca, Itanhaém, Juquiá, Luís Antônio, Pedregulho, Piracicaba, Ribeirão Preto, Serra Negra, Teodoro Sampaio], Tocantins [Itacajá]), Paraguay (Alto Paraná), Peru (Huánuco, Junín, Loreto, Madre de Dios, San Martin). |
| *Leurotrigona pusilla* | Brazil (Amapá, Amazonas [Barcelos, Esena Juami Japurá, Itacoatiara, Reserva Florestal Adolpho Ducke, Manaus, Santa Isabel Do Rio Negro, São Gabriel Da Cachoeira], Minas Gerais [Igarapé], Pará), Colombia (Caquetá), French Guiana (Sinnamary), Peru (Loreto, San Martín) |
| *Nannotrigona melanocera* | Argentina (Salta, Corientes), Bolivia (Chuquisaca, El Beni, La Paz, Santa Cruz), Brazil (Acre [Parque Nacional Serra do Divisor, Reserva Catuaba, Rio Branco, Amazonas [Esena Juami Japurá, Fonte Boa, Foz do Rio Curicuriari, Foz do Rio Juami, Lago Uará, Manaus, Rio Juruá, Rio Purus, Tefé, Vila Nova do Tonantins], Rondônia [Buritis, Campo Novo, Chupinguaia, Extrema, Ouro Preto do Oeste, Parque Estadual Guajará-Mirim, Parque Nacional de Pacáas Novos, Porto Velho, Reserva Extrativista do Rio Cautário, Reserva Extrativista do Rio Ouro Preto, São Miguel do Guaporé]), Colombia (Meta), Ecuador (Morona-Santiago, Napo, Orellana, Sucumbios, Zamora-Chinchipe), Peru (Amazonas, Cajamarca, Cusco, Huánuco, Junín, Loreto, Madre de Dios, Pasco, San Martín), Venezuela (Amazonas, Apure, Aragua, Miranda, Portuguesa) |
| *Nannotrigona minuta* | Brazil (ceará, Pará [Eldorado dos Carajás]) |
| *Nannotrigona punctata* | Brazil (Amapá [Macapá, Oiapoque], Bahia [Itaparica, Palmeiras, Salvador], Ceará [Baturité], Maranhão [Buriticupu, Carutapera, São Luis], Mato Grosso [Nova Xavantina], Pará [Belém, Conceição Do Araguaia, Igarapé-Assu, Marituba, Obidos], Paraíba [Areia, Borborema, João Pessoa, Mamanguape], Pernambuco [Igarassu, Recife]; Rio Grande do Norte [Jardim do Seridó], Roraima [Rio Branco]), French Guiana (Cayenne, Saint-Laurent-du-Maroni), Guyana (Cuyuni-Mazaruni), Suriname, Venezuela (Barinas, Merida, Miranda) |
| *Nannotrigona schultzei* | Bolivia (Cochabamba, El Beni, La Paz), Brazil (Acre [Mâncio Lima], Amapá [Oiapoque], Amazonas [Itacoatiara, Japurá, Manaus, Santa Isabel do Rio Negro, São Gabriel da Cachoeira, Tefé, Vista Alegre], Mato Grosso [Nhambiquaras], Pará [Belém, Caninde Rio Garupi, Conceição Do Araguaia, Faro, Gorotire, Igarape-Assu, Oriximiná], Rondônia [Machadinho, Vilhena]), Colombia (Amazonas, Caquetá, Guaviare), Ecuador (Sucumbios), French Guiana (Cayenne, Saint-Laurent du Maroni), Guyana (Cuyuni-Mazaruni), Peru (Cusco, Loreto, Madre de Dios), Venezuela (Amazonas) |
| *Nogueirapis butteli* | Bolivia (Cochabamba), Brazil (Amazonas [Alvarães, Barcelos, Juruá, Maraã, Nazaré, Santa Isabel Do Rio Negro, Santo Antônio do Içá, São Gabriel Da Cachoeira, São Paulo De Olivença, Tefé, Tabatinga, Tabocal, Tapurucuara Mirim, Vendaval, Vila Nova do Tonantins]), Colombia (Amazonas), Ecuador (Pichincha), Panama (Colon), Peru (Cusco, Loreto) |
| *Nogueirapis minor* | Brazil (Amapá, Amazonas [Manaus, São Gabriel da Cachoeira], Pará), Costa Rica (SanJosé), French Guiana (Cayenne, Saint-Laurent du Maroni) |
| *Paratrigona haeckeli* | Brazil (Amazonas [Barcelos], Mato Grosso [Sinop], Pará [Itaituba, Vitória do Xingu], Rondônia [Ariquemes, Guajará-Mirim, Mirante da Serra, Nova União, Nova Mamoré, Pimenta Bueno, Porto Velho]), Colombia, Ecuador (Napo), Peru (Cusco, Madre de Dios, San Martin) |
| *Paratrigona incerta* | Brazil (Bahia [Alagoinhas], Minas Gerais [Pedras De Maria Da Cruz], Paraíba [Mamanguape], Piauí [Bom Jesus], Pará), Colombia (Casanare, Meta) |
| *Paratrigona pacifica* | Bolivia (Cochabamba, La Paz), Brazil (Acre [Rio Branco], Rondônia [Guajará-Mirim, Pimenta Bueno]), Colombia (Antioquia, Risaralda, Valle del Cauca), Ecuador (Morona Santiago, Napo, Orellana, Santo Domingo de los Tsáchilas, Sucumbios), Peru (Huánuco, Junín, Loreto, Pasco, San Martin) |
| *Paratrigona peltata* | Brazil (Maranhão [Carolina, Imperatriz], Pará [Belém, Capanema, Cumaru Do Norte, Gorotire, Gradaús, Igarapé-Assu, Itaituba]) |
| *Plebeia alvarengai* | Bolivia (Cochabamba), Brazil (Amazonas [Manaus], Maranhão [Barreirinhas, Imperatriz], Mato Grosso [Nova Ubiratã], Pará [Belém, Conceição Do Araguaia, Gradaús, Jacareacanga], Rondônia [Guajará-Mirim, Nova Mamoré, Nova União, Porto Velho]), Peru (Madre de Dios) |
| *Plebeia margaritae* | Brazil (Amazonas [Manaus, Tefé], Mato Grosso [Vila Bela Da Santíssima Trindade], Rondônia [Mirante da Serra, Nova União, Pimenta Bueno, Porto Velo, Reserva Rio Cujumbi]), Ecuador (Sucumbios), Peru (Loreto, Madre de Dios, San Martin) |
| *Plebeia minima* | Bolivia (Cochabamba, La Paz), Brazil (Acre, Amapá [Macapá, Mazagão], Amazonas [Alvarães, Itacoatiara, Japurá, Manaus, Santa Isabel do Rio Negro, São Gabriel da Cachoeira, Tabatinga, Tefé, Vila Nova do Tonantins], Goiás [Aragarças] Maranhão [Barreirinhas, São Luís], Mato Grosso [Barro do Garças, Juína], Pará [Belém, Chaves, Conceição Do Araguaia, Cumaru Do Norte, Igarapé-Assú, Itaituba, Melgaço, Monte Alegre, Óbidos, Parauapebas, Rio Trairão, Santarém], Paraíba, Pernambuco, Rondônia [Alta Floresta, Campo Novo, Chupinguaia, Costa Marques, Estação Ecológica Cuniã, Extrema, Ouro Preto do Oeste, Parque Estadual Guajará-Mirim, Porto Velho, Reserva Extrativista do Rio Cautário, Reserva Extrativista do Rio Ouro Preto, Rolim de Moura, São Miguel do Guaporé], Roraima [Ilha de Maracá]), Colombia (Antioquia, Choco), Costa Rica (Puntarenas), Ecuador (Morona-Santiago, Orellana, Sucumbios), French Guiana (Cayenne, Saint-Laurent-du-Maroni), Panama (West Panama), Peru (Loreto, Madre de Dios, San Martín, Ucayali), Suriname (Sipaliwini), Venezuela (Aragua) |
| *Plebeia varicolor* | Brazil (Amazonas [Tapauá], Pará [Itaituba], Rondônia [Nova União]), Peru (Loreto) |
| *Scaura latitarsis* | Belize (Cayo), Bolivia (Cochabamba, El Beni, La Paz, Santa Cruz), Brazil (Acre [Mâncio Lima, Placido de Castro, Rio Branco], Amazonas [Carauari, Juruá, Manaus, Maués, Santa Isabel do Rio Negro, São Gabriel da Cachoeira, Tapauá, Tefé], Ceará [Meruoca, Ubajara], Goiás [Aragarças, Catalão, Luziânia, Niquelândia, Silvania], Mato Grosso [Alto Araguaia, Chapada dos Guimarães, Itacoatiara, Nhambiquaras, Nova Xavantina, Serra das Araras ], Mato Grosso do Sul [Três Lagoas], Minas Gerais [Alpinópolis, Brasilândia De Minas, Uberaba], Pará [Belém, Cachimbo, Gorotire, Gradaús], Paraná [Floraí, Londrina, Maringá], Rondônia, São Paulo [Bauru, Cajuru, Icém, Jaboticabal, Jundiaí, Lençóis Paulista, Luís Antônio, Pedregulho, Ribeirão Preto, Teodoro Sampaio], Tocantins [Galheiros, Dianópolis]), Colombia (Amazonas, Boyacá, Casanare, Cundinamarca, Meta), Costa Rica (Cartago, Limon, Puntarenas, San José), Ecuador (Napo, Orellana, Pastaza, Sucumbios), French Guiana (Cayenne, Saint-Laurent du Maroni), Mexico (Chiapas), Panama (West Panama), Peru (Amazonas, Huánuco, Junín, Loreto, Madre de Dios, Pasco, San Martin), Suriname |
| *Scaura longula* | Bolivia (El Beni), Brazil (Acre [Reserva Extrativista do Alto Juruá, Rio Branco], Amapá [Macapá, Mazagão, Oiapoque], Amazonas [Barcelos, Benjamin Constant, Japurá, Jaú, Santa Isabel do Rio Negro, Santo Antônio do Içá, São Paulo De Olivença, Tefé], Bahia, Goiás [Aragarças, Luziânia], Maranhão [Buriticupu], Mato Grosso [Barra do Garças, Juína], Mato Grosso do Sul, Minas Gerais [Araguari, Uberlândia], Pará [Belém, Gradaús, Itaituba, Oriximiná], Rondônia [Mirante da Serra, Pimenta Bueno, Porto Velho, Vilhena], Roraima [Ilha de Maracá, Parafuri], São Paulo [Ribeirão Preto, São Paulo], Tocantins [Dueré, Fátima, Gurupi, Santa Maria Do Tocantins]), Colombia (Amazonas, Casanare, Cundinamarca, Meta), Ecuador (Orellana, Sucumbios), French Guiana (Cayenne), Panama (Colon, Kuna Yala), Peru (Huánuco, Junín, Loreto, Madre de Dios, Pasco, San Martín), Suriname, Venezuela (Amazonas) |
| *Scaura tenuis* | Brazil (Acre [Parque Nacional Serra do Divisor], Amazonas [Benjamin Constant, Camaruã, Comunidade de Samaúma, Forte da Graça-Rio Juruá, Foz do Rio Curicuriari-Rio Negro, Foz do Rio Daraá-Rio Negro, Foz do Rio Marié-Rio Negro, Ipixuna, Iranduba, Japurá, Lago Uará-Rio Solimões, Manaus, Rio Andirá, Rio Cuieras, Rio Curicuriari, Rio Ipixuna, Rio Purus, Rio Japurá, Rio Juruá, Santa Isabel Do Rio Negro, São Gabriel Da Cachoeira, Tapurucuara-Mirim, Tefé], Mato Grosso [Juína, Nova Ubiratã], Minas Gerais [Bonfinópolis de Minas], Pará [Altamira, Cachimbo, Itaituba, Rio Andirá, Rio Tapajos-Tauari, Rio Trombetas-Cruz Alta], Rondônia [Campo Novo, Chupinguaia, Costa Marques, Estação Ecológica Cuniã, Extrema, Mirante da Serra, Ouro Preto do Oeste, Parque Estadual Guajará-Mirim, Pimenta Bueno, Reserva Extrativista do Rio Ouro Preto, Reserva Indígena Rio Branco, Reserva Rio Cujubim, Rio Cuieras, Rio Ji-Paraná, Rolim de Moura, São Miguel do Guaporé, Serra dos Pacaás Novos]), Colombia (Amazonas, Meta), Ecuador (Napo, Orellana, Pastaza), French Guiana (Cayenne, Saint-Laurent-du-Maroni), Peru (Loreto, Madre de Dios, Pasco, San Martín), Suriname |
| *Schwarzula coccidophila* | Brazil (Acre [Marechal Thaumaturgo, Mâncio Lima, Porto Walter, Rio Branco], Amazonas [Barcelos, Carauari, Itacoatiara, Juruá, Maraã, Rio Preto da Eva, Santa Isabel Do Rio Negro, São Gabriel Da Cachoeira, Tabocal, Tapauá, Tefé, Uarini], Pará, Rondônia [Campo Novo De Rondônia, Mirante Da Serra, Nova União, Ouro Preto Do Oeste, Porto Velho]), Peru (Huánuco, San Martin) |
| *Schwarzula timida* | Argentina (Chaco), Bolivia (Santa Cruz), Brazil (Acre [Mâncio Lima, Porto Walter, Sena Madureira], Amazonas [Manaus, Maués, Nazaré, Santa Isabel Do Rio Negro, São Gabriel Da Cachoeira, Tabatinga, Tapauá, Tefé], Goiás [Aragarças, Parque Nacional das Emas], Mato Grosso [Barra Do Garças, Chapada Dos Guimarães, Coxipó, Cuiabá, Cáceres, Porto Estrela], Mato Grosso do Sul [Bodoquena, Bonito, Corumbá, Jardim, Porto Murtinho], Minas Gerais [Lontra, Pedras De Maria Da Cruz, Pirapora, São Francisco Do Glória], Pará [Itaituba, Oriximiná, Santarém, Óbidos], Rondônia [Costa Marques, Cujubim, Guajará-Mirim, Mirante Da Serra, Nova Mamoré, Nova União, Pimenteiras Do Oeste], São Paulo [Ilha Comprida, Teodoro Sampaio]), Ecuador (Sucumbíos), Peru (Huánuco, Loreto) |
| *Tetragonisca angustula* | Argentina (Chaco, Formosa, Jujury, Misiones, Salta), Belize (Cayo), Bolivia (El Beni, Cochabamba, Santa Cruz), Brazil (Acre [Caudas, Rio Branco], Alagoas [Quebrangulo], Amapá, Amazonas [Lago do Tefé, Maués, Manaus, Rio Japurá, Tapurucuara-Mirim-Rio Negro, Vila Carixeno-Rio Negro], Bahia [Boninal, Camacan, Cruz Das Almas, Feira De Santana, Governador Mangabeira, Ibirataia, Igrapiúna, Ilhéus, Ipiaú, Itaberaba, Lençóis, Morro Do Chapéu, Mucuri, Porto Seguro, Ruy Barbosa], Ceará, Espírito Santo [Estação Biológica de Santa Lúcia, Fazenda Juliberto Stur, Fazenda Usina Paineiras], Goiás [Anápolis, Aragarcas, Baixo Rio Aporé, Bonfinópolis, Goianápolis, Goiás, Leopoldo De Bulhões, Nerópolis, Senador Canedo, Terezópolis De Goiás], Maranhão [Buriticupu], Mato Grosso [Alto Araguaia, Caceres, Chavantina-Rio das Mortes, Cuiabá, Poconé], Mato Grosso do Sul [Campo Grande, Corumbá, Ivinhema, Miranda, Porto Murtinho], Minas Gerais [Araguari, Betim, Cataguases, Igarapé, Januária, Montes Claros, Nova Lima, Paraopeba, Ponte Nova, Ritapolis, São Gonçalo Do Rio Preto, Uberlândia, Ubá, Varginha, Viçosa], Pará [Belém, Cachimbo, Conceição Do Araguaia, Cumaru Do Norte, Faro, Igarapé-Assú, Obidos, Parauapebas], Paraíba [Mamanguape], Paraná [Apucarana, Caiuba, Curitiba, Foz do Iguaçú, Londrina, Maringá, Paranaguá], Pernambuco [Aldeia, Caruaru, Catimbau, Ipojuca, Recife, São José], Rio de Janeiro [Angra Dos Reis, Baia de Guanabara, Corcovado, Gavea Pequena, Itatiaia National Park, Mangaratiba, Nova Iguaçu, Rio De Janeiro, Santa Maria Madalena, Tijuca National Park], Rio Grande do Sul [Barão De Cotegipe, Guaporé, Guarani das Missões, Ijuí, Morro Santana, Planalto, Porto Alegre, Santa Cruz do Sul, Sinimbu, Viamão], Rondônia [Chupinguaia, Costa Marques, Ouro Preto do Oeste, Parque Estadual Guajará-Mirim, Pimenta Bueno, Pimenteiras do Oeste, Porto Velho, Reserva Extrativista do Rio Ouro Preto, Rolim de Moura, Roraima, Santa Catarina [Concordia, Corupa, Guatambú, Joinville, Mafra, São Bento Do Sul, São Francisco Do Sul], São Paulo [Cajuru, Corumbataí, Franca, Guarulhos, Itararé, Piracicaba, Pirapora Do Bom Jesus, Ribeirão Preto, Rio Claro, Salesópolis, São Paulo, São Simão, Ubatuba], Sergipe [Santa Luzia Do Itanhy], Tocantins [Araguatins, Araguaína, Cachoeirinha, Cariri Do Tocantins, Darcinópolis, Dueré, Fátima, Guaraí, Gurupi, Miracema Do Tocantins, Nova Olinda, Novo Acordo, Palmas, Piraquê, Porto Nacional, Santa Maria Do Tocantins, Wanderlândia]), Colombia (Amazonas, Antioquia, Boyaca, Caldas, Caqueta, Cauca, César, Chocó, Cundinamarca, Huila, Magdalena, Meta, Norte de Santander, Quindío, Risaralda, Santander, Tolima, Valle del Cauca, Vichada), Costa Rica (Alajuela, Cartago, Guanacaste, Heredia, Limón, Puntarenas, San José), Ecuador (Esmeraldas, Imbabura, Manabi, Morona-Santiago, Napo, Orellana, Pastaza, Pichincha, Sucumbios, Zamora-Chinchipe), El Salvador (Ahuachapan, San Salvador, Santa Ana), French Guiana (Cayenne), Guatemala (Escuintla, Huehuetenango, Solola, Zacapa), Guyana, Honduras (Atlantida, Comayagua, Cortés, Francisco Morazan, Olancho), Mexico (Campeche, Chiapas, Oaxaca, Tabasco, Veracruz, Yucatan); Nicaragua (Chinandega, Masaya, Matagalpa, Region Autonoma del Atlantico Norte, Rio San Juan, Rivas), Panama (Bocas del Toro, Chiriquí, Cocle, Colon, Panama, Panama Oeste), Paraguay (Caaguazu), Peru (Cusco, Junín, Loreto, Pasco, San Martín, Ucayali), Suriname (Sipaliwini), Venezuela (Barinas, Mérida, Miranda, Portuguesa, Zulia) |
| *Tetragonisca weyrauchi* | Bolivia (Cochabamba, La Paz), Brazil (Acre [Brasiléia, Jordão, Rio Branco, Xapuri], Mato Grosso, Rondônia [Pimenta Bueno]), Peru (Junín, Madre de Dios) |
| *Trigonisca bidentata* | Brazil (Rondônia [Guajará-Mirim, Ouro Preto do Oeste, Porto Velho, Reserva Extrativista do Rio Ouro Preto]), Peru (Loreto, San Martin) |
| *Trigonisca dobzhanskyi* | Brazil (Amazonas [Manaus, Santa Isabel Do Rio Negro, São Gabriel Da Cachoeira], Pará [Belém, Cumaru Do Norte, Moju, Oriximiná], Roraima), French Guiana (Cayenne) |
| *Trigonisca extrema* | Brazil (Amazonas [Santa Isabel Do Rio Negro, São Gabriel da Cachoeira, Foz do Rio Darãa-Rio Negro], Maranhão [Barreirinhas]), Pará) |
| *Trigonisca fraissei* | Brazil (Amazonas [Santo Antônio Do Içá, São Gabriel da Cachoeira], Mato Grosso [Juína, Nhambiquaras], Pará [Anajás, Belém, Oriximiná, Soure], Rondônia [Extrema, Ouro Preto do Oeste, Parque Estadual Guajará-Mirim, Pimento Bueno, Reserva Extrativista do Rio Ouro Preto, Rolim de Moura, São Miguel do Guaporé]), Peru) |
| *Trigonisca graeffei* | Brazil (Amazonas [Lago Amanã-Maraã, Santo Antônio Do Içá], Pará [Eldorado dos Carajás], Rondônia [Extrema, Ouro Preto do Oeste, Parque Estadual Guajará-Mirim, Reserva Extrativista do Rio Ouro Preto, Rolim de Moura, São Miguel do Guaporé]), Colombia (Amazonas, Boyacá) |
| *Trigonisca hirticornis* | Brazil (Rondônia [Guajará-Mirim, Mirante Da Serra, Ouro Preto do Oeste, Porto Velho, Reserva Extrativista do Rio Ouro Preto]) |
| *Trigonisca pediculana* | Bolivia (La Paz), Brazil (Alagoas [Olho D'Água do Casado, Piranhas], Bahia [Casa Nova], Ceará [Caucaia, Guaramiranga, Icó, Senador Sá, São Gonçalo Do Amarante, Tauá], Goiás [Alto Paraíso, Cavalcante], Maranhão [Barra Do Corda, Barreirinhas, Carolina, Chapadinha, Fortaleza Dos Nogueiras, Grajaú, São Luís], Mato Grosso [Barra do Garças], Pará [Belém], Paraíba [Cabaceiras, Mamanguape, São João Do Cariri, São José dos Cordeiros, Teixeira], Pernambuco [Catimbau], Sergipe [Canindé do São Francisco]), French Guiana (Cayenne), Guyana, Peru (Loreto) |
| *Trigonisca unidentata* | Brazil (Amazonas [Tapauá]) |
| *Trigonisca variegatifrons* | Brazil (Amazonas, Mato Grosso [Campo Novo Do Parecis, Nova Ubiratã], Pará [Oriximiná, Lago Água Fria-Rio Trombetas], Rondônia [Guajará-Mirim]) |
| *Trigonisca vitrifrons* | Brazil (Amazonas [Fonte Boa, Itacoatiara, Manaus, São Gabriel Da Cachoeira, Santa Isabel do Rio Negro, Tapauá, Tefé], Mato Grosso [Nova Ubiratã], Pará [Aveiro, Belém, Rio Trombetas-Lago Água Fria, Oriximiná]), Peru (Madre de Dios) |

**References**

Albuquerque PMC, Camargo JMF (2007) Espécies novas de *Trigonisca* Moure (Hymenoptera, Apidae, Apinae). Ver Bras Entomol 51:160-175

Alvarez LJ (2015) Diversidad de las abejas nativas de la tribu Meliponini (Hymenoptera, Apidae) en Argentina. PhD tesis. La Plata, Universidad Nacional de la Plata

Brown J, Oliveira M (2014) The impact of agricultural colonization and deforestation on stingless bee (Apidae: Meliponini) composition and richness in Rondônia, Brazil. Apidologie 45: 72-188. doi:10.1007/s13592-013-0236-3

Camargo JMF, Pedro SRM, Melo GAR (2023) Meliponini Lepeletier, 1836. In Moure J, S, Urban D, Melo GAR orgs. Catalogue of Bees (Hymenoptera, Apoidea) in the Neotropical Region - online version. Available at [http://www.moure.cria.org.br/catalogue. Accessed Aug/12/2023](http://www.moure.cria.org.br/catalogue.%20Accessed%20Aug/12/2023)

Discover Life, [www.discoverlife.org](http://www.discoverlife.org)

Giannini TC, Costa WF, Borges RC, Miranda L, Costa CPW, Saraiva AM, Imperatriz-Fonseca VL (2020) Climate change in the Eastern Amazon: crop-pollinator and occurrence-restricted bees are potentially more affected. Reg Environ Change 20:9. doi: 10.1007/s10113-020-01611-y

Global Biodiversity Information Facility, [www.gbif.org](https://d.docs.live.net/3271d0383d8a921b/SchülerInnenplatte/Camila/Publicações/Cacao/www.gbif.org)

Misiewicz TM, Kraichak E, Rasmussen C (2014) Distance and habitat drive fine scale stingless bee (Hymenoptera: Apidae) community turnover across naturally heterogeneous forests in the western Amazon. Sociobiology 61:407-414. doi:10.13102/sociobiology.v61i4.407-414

Nates-Parra G (2001) Las Abejas sin aguijón (Hymenoptera: Apidae: Meliponini) de Colombia. Biota Colombiana 2:233-248

Oliveira FF, Richers BTT, Silva JR, Farias RC, Matos TAL (2013) Guia ilustrado das abelhas “sem-ferrão” das reservas Amanã e Mamirauá, Brasil (Hymenoptera, Apidae, Meliponini). Tefé, Instituto de Desenvolvimento Sustentável Mamirauá

Oliveira MM (2018) Insetos visitantes florais associados a um guaranazal (*Paullinia cupana* var. *sorbilis* (Mart.) Ducke), com notas sobre sua polinização. Master thesis. Manaus, Instituto Nacional de Pesquisa da Amazônia

Pedro SRM (2014) The stingless bee fauna in Brazil (Hymenoptera: Apidae). Sociobiology 61(4):348-354. DOI: <https://doi.org/10.13102/sociobiology.v61i4.348-354>

Rasmussen C, Delgado C (2019) Abejas sin aguijón (Apidae, Meliponini) em Loreto, Peru. Iquitos, Instituto de Investigaciones de la Amazonia Peruana

Rasmussen C, Gonzalez VH (2009) Abejas sin aguijón del Cerro Escalera, San Martín, Perú (Hymenoptera: Apidae: Meliponini). Sist. Agroeco. Mod. Biomatematic. 2: 26-32

Raudales DP (2022) Comunidades de abejas (Hymenoptera: Apidae) en ambientes contrastantes de um paisaje de la Chiquitanía, Santa Cruz, Bolívia. Master thesis. Turrialba, Centro Agronómico Tropical de Investigación y Enseñanza

SpeciesLink, <https://specieslink.net/>
